# Supplementary material
Source: Elsevier journal article supplement (https://www.sciencedirect.com/science/article/pii/S0001651919300366)
Supplement: mmc1 [file S0001651919300366:mmc1.docx]

**Material suplementario.**

**Tabla 1.** Localización de las segundas neoplasias y neoplasias sucesivas en función de la localización del tumor índice de cabeza y cuello.

| **Tumor índice: cavidad oral (n=612)** | | | |
| --- | --- | --- | --- |
|  | **2ª neo** | **3ª neo** | **4ª neo** |
| **Cabeza y cuello** | 99 (59.6%) | 31 (75.5%) | 11 (64.8%) |
| **Pulmón** | 31 (18.7%) | 4 (9.8%) | 3 (17.6%) |
| **Esófago** | 6 (3.6%) | - | - |
| **Vejiga** | 4 (2.4%) | 2 (4.9%) | - |
| **Otros** | 26 (15.7%) | 4 (9.8%) | 3 (17.6% |
| **Total** | 166 (100%) | 41 (100%) | 17 (100%) |

| **Tumor índice: cavidad orofaringe (n=907)** | | | |
| --- | --- | --- | --- |
|  | **2ª neo** | **3ª neo** | **4ª neo** |
| **Cabeza y cuello** | 92 (40.4%) | 34 (51.5%) | 6 (31.5%) |
| **Pulmón** | 61 (26.8%) | 21 (31.8%) | 8 (42.1%) |
| **Esófago** | 30 (13.2%) | 7 (10.6%) | 4 (21.1%) |
| **Vejiga** | 6 (2.6%) | - | - |
| **Otros** | 39 (17.0%) | 4 (6.1%) | 1 (5.3%) |
| **Total** | 228 (100%) | 66 (100%) | 19 (100%) |

| **Tumor índice: hipofaringe (n=417)** | | | |
| --- | --- | --- | --- |
|  | **2ª neo** | **3ª neo** | **4ª neo** |
| **Cabeza y cuello** | 32 (30.8%) | 10 (50.0%) | 3 (60.0%) |
| **Pulmón** | 33 (31.7%) | 5 (25.0%) | 1 (20.0%) |
| **Esófago** | 16 (15.4%) | 2 (10.0%) | - |
| **Vejiga** | 3 (2.9%) | - | 1 (20.0%) |
| **Otros** | 20 (19.2%) | 3 (15.0%) | - |
| **Total** | 104 (100%) | 20 (100%) | 5 (100%) |

| **Tumor índice: laringe (n=2,522)** | | | |
| --- | --- | --- | --- |
|  | **2ª neo** | **3ª neo** | **4ª neo** |
| **Cabeza y cuello** | 198 (28.1%) | 39 (33.8%) | 9 (52.9%) |
| **Pulmón** | 242 (34.3%) | 40 (34.8%) | 5 (29.4%) |
| **Esófago** | 42 (6.0%) | 10 (8.7%) | 1 (5.9%) |
| **Vejiga** | 44 (6.2%) | 8 (7.0%) | - |
| **Otros** | 179 (25.4%) | 18 (15.7%) | 2 (11.8%) |
| **Total** | 705 (100%) | 115 (100%) | 17 (100%) |
